# Supplementary material for: Biotite supports long-range diffusive transport in dissolution-precipitation creep in halite
Source: Copernicus journal article supplement (doi:10.5194/se-2021-83), 2021-06-21
Supplement: Supplementary file 1 [file se-2021-83-supplement.zip]

## **Supplementary Material: Videos of correlation status**

The videos show for all three samples the correlation status of consecutive datasets used for DVC. White depicts a successful correlation while grey and black indicate errors or no correlation, respectively. For all three samples the correlation was successful in most correlation windows, indicating that DVC can indeed be used in changing samples.
